# Supplementary material for: Comparative Analysis of Catabolic and Anabolic Dehydroshikimate Dehydratases for 3,4-DHBA Production in Escherichia coli
Source: MDPI journal article supplement (doi:10.3390/microorganisms10071357), 2022-07-05
Supplement: s1 [file s1]

**Figure S1. SDS-PAGE of purified AsbF protein.**

Lane: 1 – protein molecular mass ladder, 2 – purified AsbF protein (10  $\mu$ g), 3 – purified AsbF protein (5  $\mu$ g), 4 – crude extract of *E. coli* BL21(DE3)/pET22b-*asbF* cells (15  $\mu$ g), 5 – crude extract of *E. coli* BL21(DE3)/pET22b cells (10  $\mu$ g).

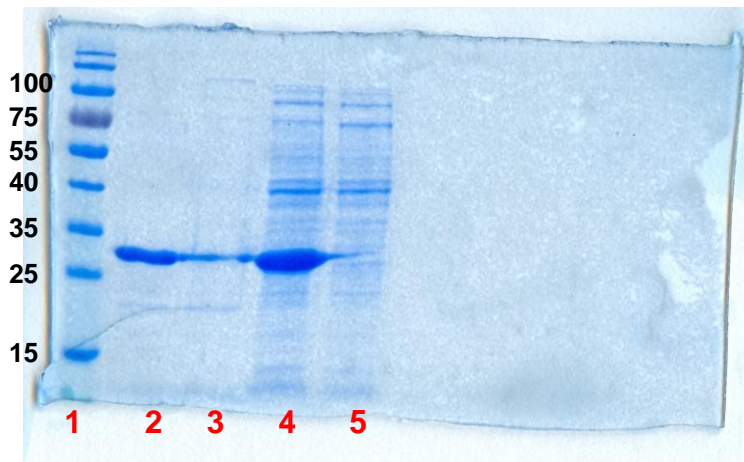

**Figure S2. SDS-PAGE of purified Qa-4 protein.**

Lane: 1 – protein molecular mass ladder, 2 – crude extract of *E. coli* BL21(DE3)/pET22b-*qa-4* cells (10  $\mu$ g), 3 – purified Qa-4 protein (10  $\mu$ g), 4 – *E. coli* BL21(DE3)/pET22b-*qa-4* cells lysate flow through (10  $\mu$ g).

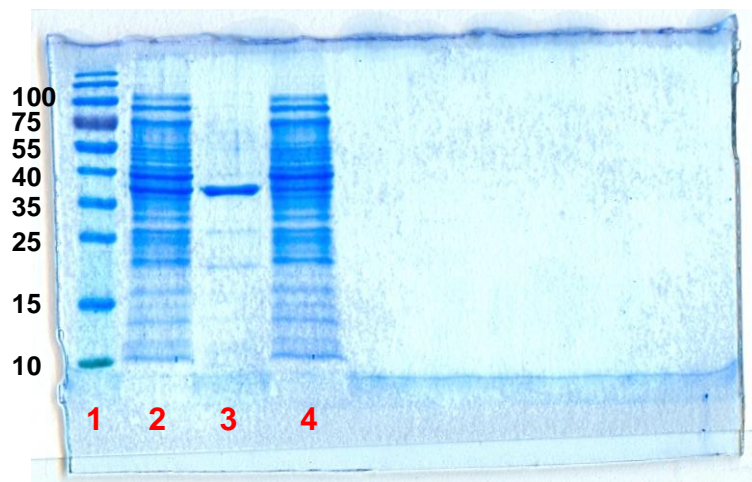

**Figure S3. SDS-PAGE of purified QsuB protein.**

Lane: 1 – protein molecular mass ladder; 3,5 – crude extracts of *E. coli* BL21(DE3)/pET22b-*qsuB* cells (20  $\mu$ g); 4,6 – purified QsuB protein (10  $\mu$ g); x – beyond the scope of current investigation.

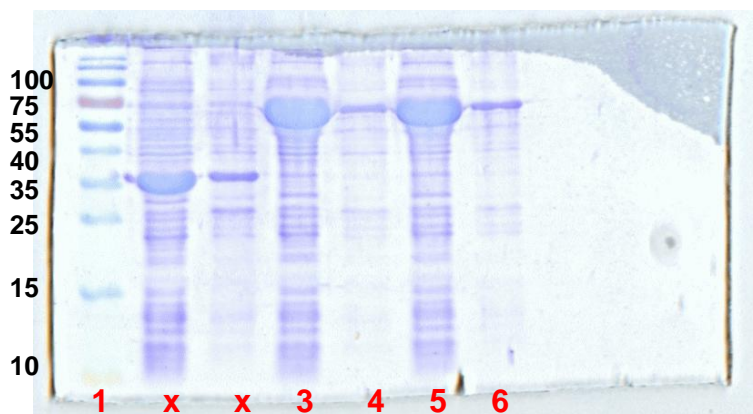

**Table S1.** Analysis of DSD kinetic properties obtained in this work and reported in literature.

| Protein | Source                                          | Kinetic parameters                                                             | pH and temperature used             | Metal cofactor                                                                                                | Reference |
|---------|-------------------------------------------------|--------------------------------------------------------------------------------|-------------------------------------|---------------------------------------------------------------------------------------------------------------|-----------|
| AsbF    | <i>B. anthracis</i>                             | $K_M$ 288.7 $\pm$ 38.9 $\mu$ M<br>$k_{cat}$ 79.84 $\pm$ 0.96 min <sup>-1</sup> | pH 7.5 and ambient temperature      | Co <sup>2+</sup><br>Ca <sup>2+</sup><br>Mg <sup>2+</sup><br>Mn <sup>2+</sup> (preferable)                     | [11]      |
|         | <i>B. thuringiensis</i> serovar konkukian 97-27 | $K_M$ 2.2 $\pm$ 0.4 $\mu$ M<br>$k_{cat}$ 130 $\pm$ 3 min <sup>-1</sup>         | pH 8.6 and 37°C                     | Mg <sup>2+</sup><br>Mn <sup>2+</sup> (preferable)                                                             | [34]      |
|         |                                                 | $K_M$ 4.6 $\pm$ 1.4 $\mu$ M<br>$k_{cat}$ 29 $\pm$ 2 min <sup>-1</sup>          | pH 8.6 and 20°C                     |                                                                                                               |           |
|         |                                                 | $K_M$ 125 $\pm$ 14 $\mu$ M<br>$k_{cat}$ 217 $\pm$ 10 min <sup>-1</sup>         | pH 8.6 and 37°C (opimal pH 8.4-8.8) | Mn <sup>2+</sup><br>Co <sup>2+</sup><br>Ni <sup>2+</sup><br>Mg <sup>2+</sup> (preferable)                     | [10]      |
|         |                                                 | $K_M$ 98 $\pm$ 11 $\mu$ M<br>$k_{cat}$ 153 $\pm$ 7 min <sup>-1</sup>           | pH 8.6 and 30°C (opimal pH 8.4-8.8) |                                                                                                               |           |
|         |                                                 | $K_M$ 36 $\pm$ 7 $\mu$ M<br>$k_{cat}$ 63 $\pm$ 6 min <sup>-1</sup>             | pH 7.5 and 20°C                     | Mn <sup>2+</sup><br>Co <sup>2+</sup><br>Mg <sup>2+</sup> (preferable)                                         | This work |
| Qa-4    | <i>N. crassa</i>                                | $K_M$ 590 $\mu$ M                                                              | pH 7.5 and 37°C                     | Mn <sup>2+</sup><br>Mo <sup>2+</sup><br>Co <sup>2+</sup><br>Ba <sup>2+</sup><br>Mg <sup>2+</sup> (preferable) | [27]      |
|         |                                                 | $K_M$ 598 $\pm$ 16 $\mu$ M<br>$k_{cat}$ 218.6 $\pm$ 1.1 s <sup>-1</sup>        | pH 7.5 and 20°C                     | Mn <sup>2+</sup><br>Co <sup>2+</sup><br>Mg <sup>2+</sup> (preferable)                                         | This work |
| QsuB    | <i>C. glutamicum</i>                            | $K_M$ 961 $\pm$ 77 $\mu$ M<br>$k_{cat}$ 60.8 $\pm$ 0.9 s <sup>-1</sup>         | pH 7.5 and 20°C (opimal pH 8.0-8.4) | Mn <sup>2+</sup><br>Mg <sup>2+</sup><br>Co <sup>2+</sup> (preferable)                                         | [13]      |
| QuiC1   | <i>P. putida</i>                                | $K_M$ 331.6 $\pm$ 51 $\mu$ M<br>$k_{cat}$ 163.6 $\pm$ 8.5 s <sup>-1</sup>      | pH 7.5 and 25°C                     | Ni <sup>2+</sup><br>Mn <sup>2+</sup><br>Mg <sup>2+</sup><br>Co <sup>2+</sup> (preferable)                     | [9]       |
